# Supplementary material
Source: PubMed Central journal article supplement (PMC3102553)
Supplement: supp_mol.111.071043_Crisford_et_al_Heterologous_expression_of_human_BK_channels_in_C_elegans_Suppl_Video_Legends_S4.pdf [file supp_mol.111.071043_Crisford_et_al_Heterologous_expression_of_human_BK_channels_in_C_elegans_Suppl_Video_Legends_S4.pdf]

**Selective Toxicity of the Anthelmintic Emodepside Revealed by Heterologous Expression of Human KCNMA1 in *Caenorhabditis elegans***

**Anna Crisford, Caitriona Murray, Vincent O'Connor, Richard J, Edwards, Nina Kruger, Claudia Welz, Georg v. Samson-Himmelstjerna, Achim Harder, Robert J. Walker and Lindy Holden-Dye**

**Molecular Pharmacology**

**Supplementary Information S4.**

**Video Legends.**

**Video S1-S4.** Wild-type or *slo-1(js379)* or *js379;pslo1::slo-1* or *js379;pslo-1::kcnma-1* were assayed for reversals as follows: L4 plus 1 day old animals were picked from food plates onto cleaning plates and then onto a no food plate on the stage of a Nikon stereomicroscope. After 2 min a 3 min video was captured at 25 frames per second using a CCD camera (World Precision Instruments).

**Video S5-S12.** Wild-type or *slo-1(js379)* or *js379;pslo1::slo-1* or *js379;pslo-1::kcnma-1* were assayed for emodepside and NS1619 sensitivity as follows: L4 plus 1 day old animals were placed either on *E.coli* modified with vehicle (control), emodepside (10 $\mu$ M) or NS1619 (10 $\mu$ M) plates for 3 h. Individual worms were picked to cleaning plates and placed on a no food plate on the stage of a Nikon stereomicroscope. After 2 min a 1 min video was captured at 25 frames per second using a CCD camera (World Precision Instruments).
