# Supplementary material
Source: PubMed Central journal article supplement (PMC3102553)
Supplement: supp_mol.111.071043_Crisford_et_al_Heterologous_expression_of_human_BK_channels_in_C_elegans_Supplmentary_Information_S3.pdf [file supp_mol.111.071043_Crisford_et_al_Heterologous_expression_of_human_BK_channels_in_C_elegans_Supplmentary_Information_S3.pdf]

Selective Toxicity of the Anthelmintic Emodepside Revealed by Heterologous  
Expression of Human KCNMA1 in *Caenorhabditis elegans*

Anna Crisford, Caitriona Murray, Vincent O'Connor, Richard J, Edwards, Nina  
Kruger, Claudia Welz, Georg v. Samson-Himmelstjerna, Achim Harder,  
Robert J. Walker and Lindy Holden-Dye

Molecular Pharmacology

**Supplementary Information S3.**

**Figure S3. Alignment of the amino acid sequences of *C. elegans* SLO-1a and human KCNMA1 (isoform b) using BLAST (NCBI; method compositional matrix adjust).**

The alignment shows 55% identity and 69% similarity/positives between the two sequences. Identical amino acids are indicated by their letter symbols and amino acids where side chains have similar physicochemical properties are indicated by "+". Gaps are indicated by "---" symbols and were introduced by the program algorithm (7% gaps) to enable analysis of the most conserved parts of the sequences. The sequences have been annotated with the following features; 'S0' to 'S6' are the transmembrane domains; 'voltage sensor'; 'P loop' is the pore domain; 'RCK1' and 'RCK2' are two domains that regulate the conductance of the potassium channel; 'Linker' is the domain between 'S6' and 'RCK1' and the length of this sequence alters the gating of the channel (Jiang Y, Lee A, Chen J, 2002: Crystal structure and mechanism of a calcium-gated potassium channel. Nature 417, 515-522); 'Calcium bowl' harbours calcium binding sites. The *slo-1* sequence has been annotated with the

location of the mutations which have been described to confer emodepside resistance (*js379*, *pd17*, *pd19*, *pd23*, *pd24*; Guest M, Bull K, Walker RJ, Amliwala K, O'Connor V, Harder A, Holden-Dye L, Hopper NA. 2007. The calcium-activated potassium channel, SLO-1, is required for the action of the novel cyclo-octadepsipeptide anthelmintic, emodepside, in *Caenorhabditis elegans*. Int J Parasitol 37:1577-88).

|        |     |                                                                |     |
|--------|-----|----------------------------------------------------------------|-----|
| SLO-1  | 6   | SPSQSKGFNQPYGYPMNCNLSRVFMEMTEEDRKCLEERKYWCFLSSITTFCASMILVVI    | 65  |
|        |     | S S S ++P M+ + V ME+ + R +R +W FL SS+ TF + +++++               |     |
| KCNMA1 | 54  | SSSSSSSVHEIPVNT-terminalTMEVPCDSRG---QRMWWAFLASSMVTSS0GGLFIILL | 107 |
| SLO-1  | 66  | WRVVTHL---CCQRREKEFVEEPIPAPEAVQINMNGSKHAPSETDPFLKQOE--KHLGWM   | 120 |
|        |     | WR + +L CC K EA +IN NGS A P +++E +GWM                          |     |
| KCNMA1 | 108 | WRTLKYLWTVCCHCYGGK-----TKEAQKIN-NGSSQADGTLKPVDEKEEAVAEVGWM     | 159 |
|        |     | Ethanol response                                               |     |
|        |     | <b>S1</b>                                                      |     |
| SLO-1  | 121 | TEAKDWAGELISGQSLTGRFVLVLFVLSIGSLIIYFYDASFQNFQVETCIPWQDSPSQ     | 180 |
|        |     | T KDWAG +IS Q+LTGR LV+LVF LSIG+L+IYF D+S +E+C + + Q            |     |
| KCNMA1 | 160 | TSVKDWAGVMISAQTLTGRVVLVLFVLSIGALVIYFIDSSNP---IESCQNFYKDFTLQ    | 216 |
| SLO-1  | 181 | IDLGFNIFFLVYFFIRFIAASDKVWFLLEMYSWIDFFTIPPSFVAIYLQRNWLGFRLRA    | 240 |
|        |     | ID+ FN+FFL+YF +RFIAA+DK+WF LE+ S +DFFT+PP FV++YL R+WLG RFLRA   |     |
| KCNMA1 | 217 | IDMAFNVFLLYFGLRFIAANDKLWFVLEVNSVVDFFTVPVVFVSVYLNRSWLGLRFLRA    | 276 |
|        |     | <b>Voltage sensor</b>                                          |     |
| SLO-1  | 241 | LRLMTVPDILQYLNILKTSSSIRLTQLVTVIFVAVCLTGAGLVHLENSGDFFKGFINPHR   | 300 |
|        |     | LRL+ +ILO+LNILKTS+SI+L L++IF++ LT AG +HL+ENSGD ++ F N          |     |
| KCNMA1 | 277 | LRLIQFSEILQFLNILKTSNSIKLVNLLSIFISTWLTAAAGFIHLVENSGDPWENFQNNQA  | 336 |
|        |     | js379/STOP                                                     |     |
| SLO-1  | 301 | ITYADSVYFVLVTMSTVGYGDIYCTTLCGRLFMIFFILFGLAMFASYVPEIADLIGNRQK   | 360 |
|        |     | +TY + VY ++VTMSTVGYGD+Y T GRLFM+FFIL GLAMFASYVPEI +LIGNR+K     |     |
| KCNMA1 | 337 | LTYWECVYLLMVTMSTVGYGDVYAKTTLGRLFMVFILGGLAMFASYVPEIIEELIGNRKK   | 396 |
|        |     | <b>Linker</b>                                                  |     |
| SLO-1  | 361 | YGGYKGEHGKHHIVVCGHITYDSVSHFLQDFLHEDRDDVDVEVVFHLRVVPDLELEGLF    | 420 |
|        |     | YGG Y G+KHIVVCGHIT +SVS+FL+DFLH+DRDDV+VE+VFLH + P+LELE LF      |     |
| KCNMA1 | 397 | YGGYSYAVSGRKHIVVCGHITLESVSNFLKDFLHKDRDDVNVEIVFLHNISPNELEALE    | 456 |
|        |     | Ca <sup>2+</sup> binding sites (high affinity)                 |     |
|        |     | pd19/A                                                         |     |
| SLO-1  | 421 | KRHFTKVEFFTGTVMDSLDSRVKIGDADACLVLANKYSTNPDAEDAANIMRVISIKNY     | 480 |
|        |     | KRHFT+VEF+ G+V++ DL+RVKI ADAACL+LANKY +PDAEDA+NIMRVISIKNY      |     |
| KCNMA1 | 457 | KRHFTQVEFYQGSVLNPHDLARVKIESADACLILANKYCADPDAEDASNIMRVISIKNYH   | 516 |
| SLO-1  | 481 | SDIRVIVQLMQYHNKAYLLNIPSWDWKRGGDVICLAEKLGFIQQSCLAPGFSTMMANLF    | 540 |
|        |     | IR+I Q++QYHNKA+LLNIPSW+WK GDD ICLAEKLGFIQQSCLA G STM+ANLF      |     |
| KCNMA1 | 517 | PKIRIITQMLQYHNKAHLLNIPSWNWKEGDDAICLAEKLGFIQQSCLAQGLSTMLANLF    | 576 |
| SLO-1  | 541 | AMRSF-KTSPHTPLWLDYLRGAGMEMYTELSPSFANMSFPEAANLLFNRLGLLLLAIE     | 599 |
|        |     | +MRSF K T W YL G EMYTE LS +F +SFP L F +L LL++AIE               |     |
| KCNMA1 | 577 | SMRSFIKIEEDT--WQKYYLEGVSNEMYTEYLSSAFVGLSFPTVCELFCVKKLLMIAIE    | 634 |
|        |     | Ca <sup>2+</sup> binding site (low affinity)                   |     |
|        |     | pd24/STOP                                                      |     |

SLO-1 600 LKDEENKECNIAINPGPHIVI QPQTQGFFIAQSADEVKRAFFWCKQCHDDIKDVSLIKK 659  
 K N+E I INPG H+ IQ T GFFIA A EVKRAFF+CK CHDDI D IKK  
 KCNMA1 635 YK-SANRESRILINPGNHLKI QEGTLGFFIASDAKEVKRAFFYCKACHDDITDPKRIKK 693

SLO-1 660 KCKNLALFRRNTKHSTAARDYSDFDALFYQNDARATDVLQQFQPQAPAGPMGHLGQQVQL 719  
 CK L+ QP  
 KCNMA1 694 GCKR-----LEDEQPST----- 705

**RCK2**

SLO-1 720 RMINQQRPSGGRNSMSIPP-----DGRGVDFSKDFEQFQDM-KYDSTGMFHWCP SRN 773  
 + +++ +GG RNS + P D + + + ++ KYDSTGMFHW C +  
 KCNMA1 706 -LSPKKKQRNGGMRNSPNTSPKLMRHDFLLIPGNDQIDNMDSNVKKYDSTGMFHWCAPKE 764

SLO-1 774 LEDCVLERHQAAMTVLNGHVVVCLFADQDSPLIGLRNFIMPLRSSNFHYHELKHVVIVGD 833  
 +E +L R +AAMTVL+GHVVVC+F D S LIGLRN +MPLR+SNFHYHELKH+V VG  
 KCNMA1 765 IEKVILTRSEAAMTVLSGHVVVCIFGDVSSALIGLRNLVMPLRASNPFHYHELKHIVFVGS 824

pd17V

SLO-1 834 LEYLRKEWKTLYNLPKISILNGSPLSRADLRAVNINLCDCMVIISARVPNTEDTTLADKE 893  
 +EYL++EW+TL+N PK+SIL G+PLSRADLRAVNINLCDCMVI+SA N +DT+L DKE  
 KCNMA1 825 IEYLRKEWETLHNFPKVSILPGTPLSRADLRAVNINLCDCMVILSANQNNIDDTSLQDKE 884

SLO-1 894 AILASLNIAKMQFDDTLGFFPMRHQ-----TGDRSPLGSP I--SMQKKGAKFGTNVPMI 945  
 ILASLNIAK+MQFDD++G Q SP SP+ +++ G N+P+I  
 KCNMA1 885 CILASLNIAKMQFDDSIGVLQANSQGFTPPGMDRSSPDNSPVHGMLRQPSITTVGNIPII 944

**“Calcium bowl”**

SLO-1 946 TELVND<sup>SNVQFLDQ</sup><sup>DDDD</sup><sup>PDTELYLTQ</sup>PFACGTAFASVLDLSMSTTYFNDSALTLIRT 1005  
 TELVND+<sup>NVQFLDQ</sup><sup>DDDD</sup><sup>PDTELYLTQ</sup>PFACGTAFASVLDLSMSTTYFNDSALTLIRT  
 KCNMA1 945 TELVND<sup>SNVQFLDQ</sup><sup>DDDD</sup><sup>PDTELYLTQ</sup>PFACGTAFASVLDLSMSTTYFNDSALTLIRT 1004

Ca<sup>2+</sup> binding sites

SLO-1 1006 LVTGGATPELELILAEAGALRGGYSTPETLSNRDRCRQAQISLQDNPNYDGVVHNTTYGAM 1065  
 LVTGGATPELE ++AE LRGYSTP+TL+NRDRCR+AQ++L D P+ + YG +  
 KCNMA1 1005 LVTGGATPELEALIAEENALRGGYSTPQTLANRDRCRVAQLALLDGGPFADLGDGGCYGDL 1064

SLO-1 1066 FTIALRRYQQLCIGLYRLHD---QDNPDMSKRYVITNPPAELRIKNTDYVYVLEQFD 1119  
 F AL+ Y LC G+YRL D KRYVITNPP E + TD ++ L QFD  
 KCNMA1 1065 FCKALKTYNMLCFGIYRLRDAHLSTPSQCTKRYVITNPPYEFELVPTDLIFCLMQFD 1121
